# Supplementary material for: Predictors of remission in rheumatoid arthritis patients treated with biologics: a systematic review and meta-analysis
Source: Springer Nature journal article supplement (doi:10.1007/s10067-022-06307-8), 2022-08-16

**Supplementary Fig.6** Sensitivity analysis for: A, age. B, female gender. C, disease activity. D, disease duration. E, prior use of MTX

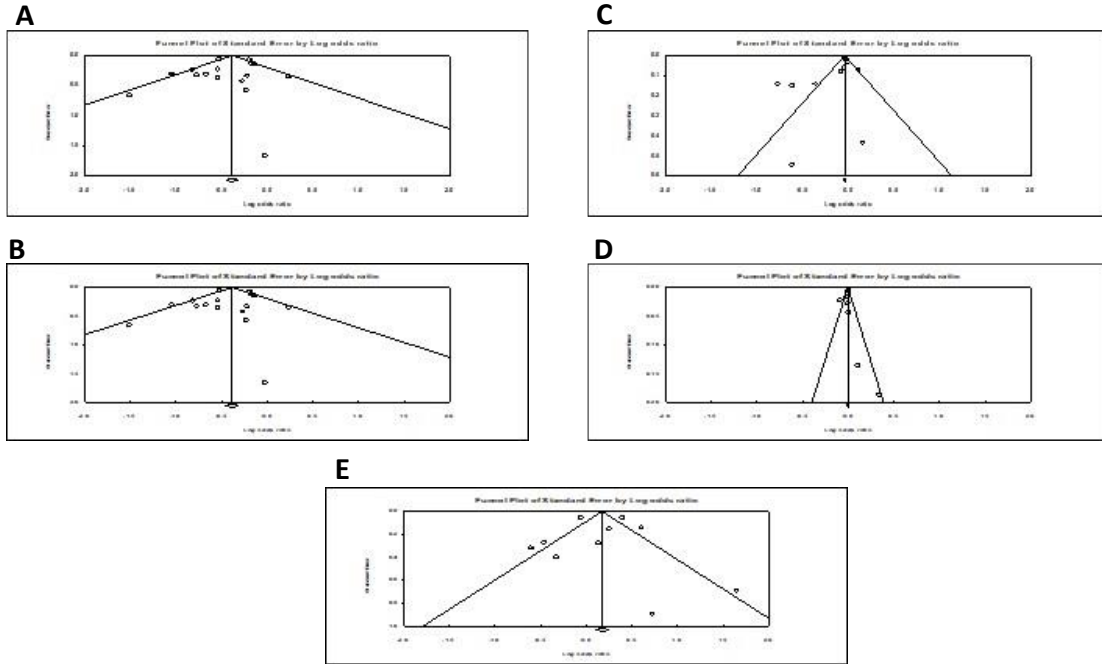

Supplement: MOESM1 [file 23370272]
